RESEARCH ARTICLE

# Comparative Pollen Morphological Analysis and Its Systematic Implications on Three European Oak (*Quercus* L., Fagaceae) Species and Their Spontaneous Hybrids

Dorota Wrońska-Pilarek<sup>1\*</sup>, Władysław Danielewicz<sup>1</sup>, Jan Bocianowski<sup>2</sup>, Tomasz Maliński<sup>1</sup>, Magdalena Janyszek<sup>3</sup>

**1** Department of Forest Botany, Poznan University of Life Sciences, Poznań, Poland, **2** Department Mathematical and Statistical Methods, Poznan University of Life Sciences, Poznań, Poland, **3** Department of Botany, Poznan University of Life Sciences, Poznań, Poland

\* [pilarekd@up.poznan.pl](mailto:pilarekd@up.poznan.pl)

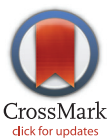

**OPEN ACCESS**

**Citation:** Wrońska-Pilarek D, Danielewicz W, Bocianowski J, Maliński T, Janyszek M (2016) Comparative Pollen Morphological Analysis and Its Systematic Implications on Three European Oak (*Quercus* L., Fagaceae) Species and Their Spontaneous Hybrids. PLoS ONE 11(8): e0161762. doi:10.1371/journal.pone.0161762

**Editor:** Filippos A. Aravanopoulos, Aristotle University of Thessaloniki, GREECE

**Received:** February 5, 2016

**Accepted:** August 11, 2016

**Published:** August 26, 2016

**Copyright:** © 2016 Wrońska-Pilarek et al. This is an open access article distributed under the terms of the [Creative Commons Attribution License](https://creativecommons.org/licenses/by/4.0/), which permits unrestricted use, distribution, and reproduction in any medium, provided the original author and source are credited.

**Data Availability Statement:** All relevant data are within the paper.

**Funding:** The author(s) received no specific funding for this work.

**Competing Interests:** The authors have declared that no competing interests exist.

## Abstract

Pollen morphology of three parental *Quercus* species (*Q. robur* L., *Q. petraea* (Matt) Liebl, *Q. pubescens* Willd.) and two spontaneous hybrids of these species (*Q. xcalvescens* Vuk. = *Q. petraea* × *Q. pubescens* and *Q. xrosacea* Bechst. = *Q. robur* × *Q. petraea*) was investigated in this study. The pollen originated from 18 natural oak sites and 67 individuals (oak trees). Each individual was represented by 30 pollen grains. In total, 2010 pollen grains were measured. They were analysed for nine quantitative and four qualitative features. Pollen size and shape were important features to diagnosing *Quercus* parental species and hybrids. On the basis of exine ornamentation, it was possible to identify only *Q. pubescens*, while the remaining species and hybrids did not differ significantly with respect to this feature. The determination of the diagnostic value of endoaperture features requires further palynological studies. On the basis of pollen size and shape *Q. robur* × *Q. petraea* was clearly separated. Grouping of 67 oak trees on the basis of pollen grain features has shown that individuals from different as well as same taxa occurred in the same groups. Likewise, with respect to natural sites, oak trees originating from the same places as well as from geographically distant ones, grouped together. Pollen morphological features allow to distinguish a part of the studied *Quercus* taxa. Therefore, it can be used as an auxiliary feature in the taxonomy.

## Introduction

*Quercus* genus is the largest genus in the Fagaceae family. Depending on different authorities, the number of oak species varies between 300 and 400 [1–5], through 500–531 [6, 7] up to 600 [8, 9]. The members of this genus occupy territories of the Northern Hemisphere in Asia, North America, Europe and Africa, with a few species extending to the equator [10–14].

The taxonomy of *Quercus* genus is extremely complex as a result of high species numbers, wide geographical distribution, great morphological variability, as well as widespread hybridization between infrageneric taxa and changes in morphological features [7, 8, 15–21]. Therefore, the classification of oaks has been a matter of debate, from De Candolle [22] to Nixon [13], and more than 20 classifications were proposed [16, 23].

Up to date, the most taxonomically valuable morphological features of *Quercus* species are foliar and fruit characteristics. Hence, the taxonomic classifications of oaks are usually based on these features [5, 13, 15, 24, 25]. According to Menitski's [11] classification, the three species analyzed for the present study belong to the *Quercus* L., subgenus *Quercus*, section *Quercus*, series *Quercus* and the subseries: *Quercus*—*Quercus robur* L., *Quercus petraea* (Matt.) Liebl. and *Galliferae* (Spach) Guerke—*Quercus pubescens* Willd. According to the infrageneric groups recognized by Denk and Grimm [26] the three species belong to the *Quercus*, Group *Quercus*.

Occurrence and frequency of interspecific hybrids in natural European oak populations has not been clarified satisfactorily so far [27]. In the botanical literature, interspecific hybrids in natural European oak populations have been distinguished for a long time, primarily on the basis of morphological traits of indirect characters between the alleged parental species [1, 24, 28]. They comprise, among others, such taxons as: *Quercus* × *calvescens* Vuk. (*Q. petraea* × *Q. pubescens*), *Q. × kernerii* Simk. (*Q. robur* × *Q. pubescens*) and *Q. × rosacea* Bechst. (*Q. robur* × *Q. petraea*).

According to Rushton [20], in mixed populations of *Q. robur* and *Q. petraea*, the proportion of trees morphologically “truly intermediate” between the above species in north-western Europe, estimated on the basis of data quoted by different researchers, ranges from 2 to 29%. Many authors think that hybrids between these species are rare, and frequency of their appearance in natural population is approximately 2–3% [15, 29–35].

However, detailed comparative, palynological studies of pollen grain characters between oak hybrids and parental species have not been performed. These characters were described for taxonomic purposes in numerous studies using scanning electron microscopy (SEM) [17, 36–48]. Many researchers maintain, that pollen morphology can be a valuable source of information for *Quercus* taxonomy [17, 36–40, 43, 45, 46], whereas others contest the possibility of differentiating species through characteristics of pollen grains, since intraspecific variability may appear to be the same or greater than interspecific differences [49–52].

Palynological studies on interspecific hybrids concern artificial hybrids [53–59], or spontaneous hybrids found in nature [60–65]. In these studies only a few, selected quantitative pollen features are usually compared; most commonly they include pollen size [55, 57–60, 62–66], more rarely—exine ornamentation [38, 40, 53, 54, 56] or aperture numbers [54, 55]. Only few researchers investigated also the different degrees of deformed pollen grains deformation in parental species and hybrids [60, 64].

A recent pollen morphological study focusing on pollen ornamentation [38] showed that this pollen character is diagnostic for six major infrageneric groups within *Quercus*. These six infrageneric groups are also recognized by molecular phylogenetic studies [26, 67, 68].

Therefore, the aim of our study was to evaluate whether and how pollen grains of the three studied parental species (*Q. robur* L., *Q. petraea* (Matt) Liebl., *Q. pubescens* Willd.) differ from those of their spontaneous hybrids: *Quercus* × *calvescens* Vuk. (*Q. petraea* × *Q. pubescens*), and *Q. × rosacea* Bechst. (*Q. robur* × *Q. petraea*). This has not been the object of palynological studies so far. In addition, pollen grain variability of the investigated oak taxa has not yet been comprehensively analysed. We think that one of the strengths of this study is that we take advantage of a relatively large sample from several individuals, in order to capture much of intraspecific variability, in contrast to other studies, that focus in distinguishing different phylogenetic groups [44–46, 49].

## Material and Methods

While gathering sufficiently large samples from typical *Q. robur*, *Q. petraea* and *Q. pubescens* individuals was not difficult, the collection of inflorescences from trees morphologically intermediate between them (assumed hybrids) was considerably limited, because of their rare occurrence. The assumed hybrids collected from Bielinek, the sole *Q. pubescens* site in Poland (52°56'26"N, 14°8'54"E) comprised mainly *Q. petraea* × *Q. pubescens* hybrids, although single specimens of *Q. robur* × *Q. pubescens* cannot be excluded. Plant materials in the form of fresh inflorescences was selected and verified by Professor Władysław Danielewicz (Department of Forest Botany, Poznań University of Life Sciences), whereas, that from the Herbarium of the Institute of the Dendrology of Polish Academy of Sciences in Kórnik was verified by Professor Jerzy Zieliński. In this study, pollen morphology of three parental *Quercus* species (*Q. robur* L., *Q. petraea* (Matt) Liebl, *Q. pubescens* Willd.) and two spontaneous hybrids of these species (*Quercus* × *calvescens* Vuk. = *Q. petraea* × *Q. pubescens* and *Q. ×rosacea* Bechst. = *Q. robur* × *Q. petraea*) were analysed (Table 1).

Male inflorescences investigated for this study originate from 18 natural oaks sites, located in Austria, Bulgaria, Greece (Corfu), Spain, Crimea, Moldova and Poland. Except for the Polish material, male inflorescences were obtained from herbarium material stored in the Herbarium of the Institute of Dendrology of the Polish Academy of Sciences in Kórnik (52°14'12"N, 17°05'55"E)–KOR (Poland) (Table 1). Several, randomly selected inflorescences were collected from each of 67 oak individuals. Each individual is represented by 30 correctly formed, mature pollen grains [69]. In total, 2010 pollen grains were measured. Malformed pollen grains were also noticed in the samples, and their percentage was determined considering 1000 pollen grains in *Q. petraea* and *Q. robur* (five randomly selected samples of 200 pollen grains), and 600 grains in *Q. pubescens* and *Q. petraea* × *Q. pubescens* (three samples) and 200 pollen grains in the rare hybrid *Q. robur* × *Q. petraea*.

For the measurements, samples were acetolysed according to Erdtman's method [70]. The acetolysing mixture was made up of nine parts of acetic acid anhydride and one part of concentrated sulphuric acid and the process of acetolysis lasted 2.5 minutes. The measurements were made on acetolysed grains with light microscope (Biolar 2308) and observations of qualitative features were carried out with scanning electron microscope (Hitachi S-3000N) on acetolysed grains to.

Pollen grains were prepared in glycerine jelly and measured using the eyepiece (ocular) with scale. Next, the pollen grains were analysed for nine quantitative features, i.e. length of polar axis (P), equatorial diameter (E), length of ectocolpi (Le), thickness of exine along polar axis (Exp) and equatorial diameter (Exe) and four ratios: P/E, Exp/P, Exe/E, Le/P; and the following qualitative ones: exine ornamentation, endoaperture type, pollen outline and shape.

The palynological terminology follows Punt et al. [71] and Hesse et al. [72].

Firstly, the normality of the distributions of the studied traits (P, E, P/E, Exp, Exe, Exp/P, Exe/E, Le and Le/P) was tested using the Shapiro-Wilk's normality test [73]. Multivariate analysis of variance (MANOVA) was performed on the basis of the following model using a procedure MANOVA in GenStat 17th edition:  $Y = XT + E$ , where:  $Y$  is ( $n \times p$ )–dimensional matrix of observations,  $n$  is number of all observations,  $p$  is number of traits (in this study  $p = 9$ ),  $X$  is ( $n \times k$ )–dimensional matrix of design,  $k$  is number of taxa (in this study  $k = 5$ ),  $T$  is ( $k \times p$ )–dimensional matrix of unknown effects,—is ( $n \times p$ )–dimensional matrix of residuals. Next, one-way analyses of variance (ANOVA) were performed in order to verify the zero hypothesis on a lack of taxon effect in terms of values of observed traits, i.e. P, E, P/E, Exp, Exe, Exp/P, Exe/E, Le and Le/P for each trait independent, on the basis of the following model:  $y_{ij} = \mu + \tau_i + \varepsilon_{ij}$  where:  $y_{ij}$  is  $j$ th observation of  $i$ th taxon,  $\mu$  is grand mean,  $\tau_i$  is effect of  $i$ th taxon and  $\varepsilon_{ij}$  is an

**Table 1. List of localities of the studied *Quercus* taxa.**

| No | Species-Taxon                                                        | Localities                                                                                | Coordinates            | Collector, herbarium     | No of trees (samples) for each location |
|----|----------------------------------------------------------------------|-------------------------------------------------------------------------------------------|------------------------|--------------------------|-----------------------------------------|
| 1  | <i>Q. petraea</i> (Matt) Liebl.                                      | Dębno, zachodniopomorskie, Poland                                                         | 52°44'20"N, 14°41'52"E | Danielewicz; PZNF        | 5                                       |
| 2  | <i>Q. petraea</i> (Matt) Liebl.                                      | Poznań - Marcelin, wielkopolskie, Poland                                                  | 52°24'23"N, 16°51'86"E | Danielewicz; PZNF        | 2                                       |
| 3  | <i>Q. petraea</i> (Matt) Liebl.                                      | Puszcza Bukowa, zachodniopomorskie, Poland                                                | 53°20'12"N, 14°40'29"E | Danielewicz; PZNF        | 5                                       |
| 4  | <i>Q. petraea</i> (Matt) Liebl.                                      | Rokita, zachodniopomorskie, Poland                                                        | 53°45'53"N, 14°50'27"E | Danielewicz; PZNF        | 3                                       |
| 5  | <i>Q. petraea</i> (Matt) Liebl.                                      | Różańsko, zachodniopomorskie, Poland                                                      | 52°50'56"N, 14°46'54"E | Danielewicz; PZNF        | 5                                       |
| 6  | <i>Q. petraea</i> (Matt) Liebl.                                      | Wielkopolski National Park, wielkopolskie, Poland Province                                | 52°16'94"N, 16°47'57"E | Danielewicz; PZNF        | 5                                       |
| 7  | <i>Q. petraea</i> (Matt) Liebl.                                      | Vitosha Mts., Bulgaria, 950 m                                                             | 42°34'00"N, 23°17'00"E | Vihodcevsky; KOR         | 1                                       |
| 8  | <i>Q. petraea</i> (Matt) Liebl.                                      | Vall de Ribes, Pyrenees Mts., Spain, 1500 m                                               | 42°37'56"N, 0°39'28"E  | Boratyński; KOR          | 1                                       |
| 9  | <i>Q. pubescens</i> Willd.                                           | Bielinek, zachodniopomorskie, Poland                                                      | 52°56'26"N, 14°8'54"E  | Maliński; PZNF           | 10                                      |
| 10 | <i>Q. pubescens</i> Willd.                                           | Hafnerberg, Austria                                                                       | 48°01'00"N, 16°01'00"E | Browicz; KOR             | 1                                       |
| 11 | <i>Q. pubescens</i> Willd.                                           | Perithia, Korfu, Greece                                                                   | 39°76'46"N, 19°87'54"E | Boratyński, Browicz; KOR | 1                                       |
| 12 | <i>Q. pubescens</i> Willd.                                           | Crimea, Russia                                                                            | 45°18'00"N, 34°24'00"E | Dzewanowskaya; KOR       | 1                                       |
| 13 | <i>Q. robur</i> L.                                                   | Białowieża, podalskie, Poland                                                             | 52°45'76"N 23°52'45"E  | Danielewicz; PZNF        | 5                                       |
| 14 | <i>Q. robur</i> L.                                                   | Jarocin, wielkopolskie, Poland                                                            | 51°58'23"N, 17°30'12"E | Danielewicz; PZNF        | 2                                       |
| 15 | <i>Q. robur</i> L.                                                   | Promno, wielkopolskie, Poland                                                             | 52°27'37"N, 17°14'44"E | Danielewicz; PZNF        | 5                                       |
| 16 | <i>Q. robur</i> L.                                                   | Puszcza Bukowa, zachodniopomorskie, Poland                                                | 53°20'12"N, 14°40'29"E | Danielewicz; PZNF        | 1                                       |
| 17 | <i>Q. robur</i> L.                                                   | Rogalin, wielkopolskie, Poland                                                            | 52°14'43"N, 16°56'27"E | Danielewicz; PZNF        | 2                                       |
| 18 | <i>Q. robur</i> L.                                                   | Rokita, zachodniopomorskie, Poland                                                        | 53°45'53"N, 14°50'27"E | Danielewicz; PZNF        | 5                                       |
| 19 | <i>Q. robur</i> L.                                                   | Wielkopolski National Park, wielkopolskie, Poland                                         | 52°16'94"N, 16°47'57"E | Danielewicz; PZNF        | 2                                       |
| 20 | <i>Q. robur</i> L.                                                   | Andrusul de Sus, Moldova                                                                  | 46°0'20"N, 28°14'51"E  | Poneasheskij; KOR        | 1                                       |
| 21 | <i>Q. xcalvescens</i> Vuk. = <i>Q. petraea</i> × <i>Q. pubescens</i> | Bielinek, zachodniopomorskie, Poland                                                      | 52°56'26"N, 14°8'54"E  | Maliński; PZNF           | 3                                       |
| 22 | <i>Q. xrosacea</i> Bechst. = <i>Q. robur</i> × <i>Q. petraea</i>     | Poznań, Dendrological Garden of Poznan University of Life Sciences, wielkopolskie, Poland | 52°25'40"N, 16°53'57"E | Danielewicz; PZNF        | 1                                       |

KOR—Herbarium of the Institute of Dendrology, Polish Academy of Sciences, Kórnik, Poland; PZNF—Herbarium of Department of Forest Botany, Poznan University of Life Sciences, Poland.

doi:10.1371/journal.pone.0161762.t001

error observation. The minimal and maximal values of traits as well as arithmetical means and coefficients of variation—CV (in %)—were calculated. Moreover, the Fisher’s least significant differences (LSDs) were also estimated at the significance level  $\alpha = 0.001$ . The relationships between the observed traits were assessed on the basis of Pearson’s correlation coefficients using the FCORRELATION implementation in GenStat 17th edition. The parallel coordinate plot has been proposed as an efficient tool for visualization of species and their hybrids visualization [74, 75]. Results were also analysed using multivariate methods. The analysis of canonical variables was applied in order to present multitrait assessment of similarity of tested genotypes (two separate analyses: first for species and hybrids and second for trees) in a lower number of dimensions with the least possible loss of information [76]. This makes it possible to illustrate variation in genotypes in terms of all observed traits a graphic way. Mahalanobis’ distance was suggested as a measure of “polytrait” genotypes similarity [77], whose significance was verified by means of critical value  $D_\alpha$  called “the least significant distance” [78].

Mahalanobis' distances were calculated for taxa and trees, independently. All the analyses were conducted using the GenStat 17th edition statistical software package [79].

## Results

### General pollen morphology

Quantitative features of pollen grains are summarized in Table 2 and illustrated with scanning electron micrographs (Figs 1A–1M and 2A–2H). Pollen grains of the examined taxa are monads, isopolar, radially symmetrical. The pollen grains are tricolporoidate or tricolpate.

According to Erdtman's [80] pollen size classification, the studied pollen grains of parental species were medium—99% (25.1–50  $\mu$ m), very rarely (1%) small-sized (10.0–25.0  $\mu$ m). The size of all pollen of hybrids was medium (Table 2).

Parental species exhibited smaller pollen grains as compared to hybrids. The average length of the polar axis (P) in parental *Quercus* species was 31.24 (22.00–42.00)  $\mu$ m and in hybrids—33.27 (28.00–42.00)  $\mu$ m. In parental species, the shortest polar axis (P) occurred in the pollen of *Q. petraea* (22.00  $\mu$ m), while the longest one—in *Q. robur* and *Q. pubescens* (42.00  $\mu$ m). For hybrids, the shortest polar axis (P) was found in *Q. petraea*  $\times$  *Q. pubescens* (28.00  $\mu$ m) and the longest one—in *Q. robur*  $\times$  *Q. petraea* (42.00  $\mu$ m; Table 2). The mean length of the equatorial diameter (E) in parental *Quercus* species amounted to 29.90 (20.00–40.00)  $\mu$ m and in hybrids—31.63 (24.00–40.00)  $\mu$ m.

In all studied taxa, the outline in polar view was mostly circular, more rarely triangular or elliptic, whereas in equatorial view it was mostly elliptic or circular.

The mean P/E ratio in parental *Quercus* species was 1.05 and ranged from 0.75 to 1.64 in *Q. robur* and in hybrids it was 1.06 (range 0.83–1.42) in *Q. petraea*  $\times$  *Q. pubescens* (Table 2). With respect to features, pollen shapes of parental species and hybrids were different (Table 3). In the case of parental species, most frequent pollen grains were prolate-spheroidal (36.2%), spheroidal (26.6%) and oblate-spheroidal (20.4%), while subprolate ones occurred more rarely (14.2%), prolate (1.5%) and suboblate (1.1%) pollen were found only sporadically. In hybrids, spheroidal (32.5%) and prolate-spheroidal (30.8%) pollen grains were most common, while oblate-spheroidal and subprolate (17.5% each) were not so frequent and prolate and suboblate pollen were encountered only in single grains (0.8% each). Slightly different results were obtained when analysing the distribution of pollen shape class in individual taxa. In the case of parental species, the results were similar to those reported above, but in hybrids—they differed significantly both from one another and from parental species (Table 3). *Quercus robur*  $\times$  *Q. petraea* was distinguished by the highest number of elongated pollen grains (subprolate—40% and prolate-spheroidal—46.7%). In *Q. robur*  $\times$  *Q. petraea*—spheroidal pollen were not numerous (13.3%), while oblate-spheroidal pollen—fairly frequent in other taxa (17.2–24.4%)—did not occur at all. On the other hand, *Q. petraea*  $\times$  *Q. pubescens*, in contrast to *Q. xrosacea*, exhibited most frequently spheroidal (38.9%) and oblate-spheroidal (24.4%) pollen accompanied by the lowest proportion of prolate-spheroidal pollen (25.6%) among the studied taxa.

The mean exine thickness was 1.08 (0.4–2.0)  $\mu$ m (parental species) and 1.19 (0.60–2.0)  $\mu$ m (hybrids; Table 2). Exine was thinnest in *Q. petraea* (0.4  $\mu$ m) and thickest (2.0  $\mu$ m) among all studied species. In hybrids, exine thickness varied the least, from 0.6  $\mu$ m in both studied taxa to 2.0  $\mu$ m—in *Q. petraea*  $\times$  *Q. pubescens*. The relative thickness of the exine (Exp/P ratio) was similar for parental species and hybrids amounting to 0.04 (0.01–0.1) and 0.04 (0.02–0.08), respectively.

Pollen grains had three apertures and were tricolpate or tricolporoidate (this is in angiosperm pollen a rare character, when ectoaperture consists of a colpus with an indistinct endoaperture). Colpi were arranged meridionally, regularly. They were very narrow, with acute to



**Table 2. Range (min-max), mean values and coefficient of variation (cv) of studied features.** One-way ANOVA's were performed separately for each of traits. Same letters indicate a lack of statistically significant differences between analyzed taxa according to Tukey's *post hoc* test ( $p < 0.001$ ).

| Feature                                 | P               |            |        | E       |          |        | P/E           |          |        |
|-----------------------------------------|-----------------|------------|--------|---------|----------|--------|---------------|----------|--------|
| Species                                 | Min-Max         | Mean       | CV (%) | Min-Max | Mean     | CV (%) | Min-Max       | Mean     | CV (%) |
| <i>Q. petraea</i>                       | 22–40           | 31.37 b    | 8.01   | 20–40   | 30.26 bc | 9.60   | 0.8125–1.5    | 1.043 b  | 9.92   |
| <i>Q. pubescens</i>                     | 24–42           | 31.78 b    | 8.69   | 22–38   | 30.31 bc | 7.94   | 0.8–1.545     | 1.052 b  | 9.62   |
| <i>Q. robur</i>                         | 24–42           | 30.79 b    | 9.32   | 20–38   | 29.26 c  | 9.69   | 0.75–1.636    | 1.060 b  | 11.56  |
| <i>Q. petraea</i> × <i>Q. pubescens</i> | 28–38           | 32.00 b    | 5.85   | 24–36   | 31.24 ab | 7.65   | 0.8333–1.417  | 1.030 b  | 9.34   |
| <i>Q. robur</i> × <i>Q. petraea</i>     | 32–42           | 37.07 a    | 7.05   | 30–40   | 32.80 a  | 6.52   | 1–1.312       | 1.133 a  | 7.71   |
| LSD <sub>0.001</sub>                    |                 | 1,63       |        |         | 1,69     |        |               | 0,067    |        |
| F statistic                             |                 | 46.04***   |        |         | 27.94*** |        |               | 7.19***  |        |
| Feature                                 | Exp             |            |        | Exe     |          |        | Exp/P         |          |        |
| Species                                 | Min-Max         | Mean       | CV (%) | Min-Max | Mean     | CV (%) | Min-Max       | Mean     | CV (%) |
| <i>Q. petraea</i>                       | 0.4–2           | 1.025 bc   | 41.96  | 0.4–2   | 1.017 bc | 40.68  | 0.0111–0.0909 | 0.0329 a | 43.17  |
| <i>Q. pubescens</i>                     | 0.6–2           | 1.066 abc  | 37.94  | 0.6–2   | 1.033 bc | 35.61  | 0.0158–0.0769 | 0.0337 a | 38.39  |
| <i>Q. robur</i>                         | 0.6–2           | 1.182 ab   | 38.45  | 0.6–2   | 1.150 ab | 37.66  | 0.0158–0.0769 | 0.0387 a | 39.33  |
| <i>Q. petraea</i> × <i>Q. pubescens</i> | 0.6–2           | 1.304 a    | 37.37  | 0.6–2   | 1.291 a  | 37.17  | 0.0167–0.0714 | 0.0408 a | 37.39  |
| <i>Q. robur</i> × <i>Q. petraea</i>     | 0.6–1.4         | 0.880 c    | 27.09  | 0.6–1.4 | 0.853 c  | 26.07  | 0.0150–0.0368 | 0.0237 b | 25.36  |
| LSD <sub>0.001</sub>                    |                 | 0.266      |        |         | 0.253    |        |               | 0.009    |        |
| F statistic                             |                 | 19.59***   |        |         | 19.02*** |        |               | 24.89*** |        |
| Features                                | Exe/E           |            |        | Le      |          |        | Le/P          |          |        |
| Species                                 | Min-Max         | Mean       | CV (%) | Min-Max | Mean     | CV (%) | Min-Max       | Mean     | CV (%) |
| <i>Q. petraea</i>                       | 0.012–0.09091   | 0.03402 ab | 43.12  | 16–36   | 26.18 b  | 11.92  | 0.5714–1      | 0.835 b  | 8.83   |
| <i>Q. pubescens</i>                     | 0.01579–0.07692 | 0.03427 ab | 36.39  | 18–38   | 26.97 b  | 11.62  | 0.4737–1      | 0.849 ab | 7.62   |
| <i>Q. robur</i>                         | 0.0117–0.1      | 0.0399 a   | 40.43  | 18–38   | 26.32 b  | 13.04  | 0.6000–1      | 0.854 ab | 8.25   |
| <i>Q. petraea</i> × <i>Q. pubescens</i> | 0.01765–0.08333 | 0.04194 a  | 40.82  | 20–32   | 27.31 b  | 9.89   | 0.6875–1      | 0.853 ab | 7.87   |
| <i>Q. robur</i> × <i>Q. petraea</i>     | 0.015–0.04375   | 0.02620 b  | 27.86  | 28–36   | 32.07 a  | 6.85   | 0.7778–1      | 0.867 a  | 5.85   |
| LSD <sub>0.001</sub>                    |                 | 0.009      |        |         | 1.964    |        |               | 0.023    |        |
| F statistic                             |                 | 23.44***   |        |         | 28.66*** |        |               | 8.89***  |        |

P—length of polar axis; E—equatorial diameter; Le—length of ectocolpi; Exp—thickness of exine along polar axis; Exe—thickness of exine along equatorial diameter.

\*\*\*  $P < 0.001$ .

doi:10.1371/journal.pone.0161762.t002

narrowly obtuse ends. Commonly colpi were covered at the equator by a geniculum—a bulge formed by sexine extensions. Colpus membranes were usually smooth. Colpi were long; mean length in parental species—26.40 (16–38)  $\mu\text{m}$  and in hybrids—28.50 (20–36)  $\mu\text{m}$  (Table 2). On average, the length of colpi in parental species comprised 84% of the polar axis length and in hybrids—86%. Therefore, parental species, on average, exhibited slightly shorter colpi in comparison with hybrids. Their width was variable and usually greatest in the equatorial region. An endoaperture was absent to clearly-developed.

In all studied taxa, exine ornamentations in SEM were granulate or granulate-verrucate, because they were made up, primarily of granules less than 1  $\mu\text{m}$  in size (usually measuring from 0.5 to 1  $\mu\text{m}$ ), and less frequently greater than 1  $\mu\text{m}$  verrucae (wart-like elements, broader than high; Hesse et al. [72]) (Figs 1E, 1H, 1M, 2D and 2H). In all the examined taxa, with the exception of *Q. pubescens* (Fig 1H), small and low granules, usually measuring from 0.1 to 0.3  $\mu\text{m}$ , also occurred profusely. Perforations of varying diameters were minor, scarce to numerous, and sometimes not observed.

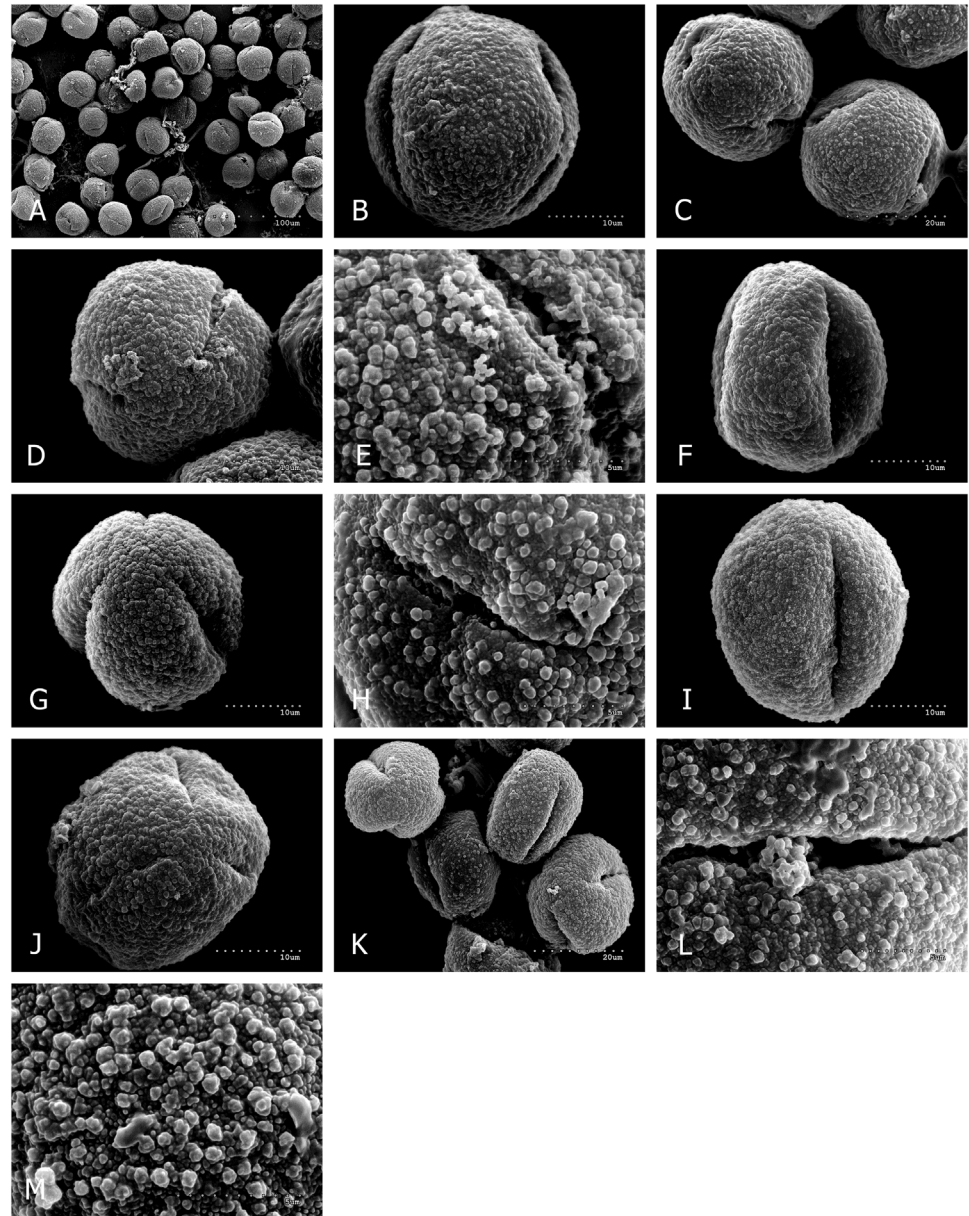

**Fig 1.** *Q. petraea*, A-E. A, numerous pollen grains in polar and equatorial view, spheroidal or prolate-spheroidal in shape; B, equatorial view; C, polar and equatorial view of two pollen grains; D, polar view with two ectocolpi; E, ectocolpus and granulate-verrucate exine ornamentation with the biggest verrucae (>1 μm), slightly smaller granules (0.5–1 μm), and the smallest and low granules (0.1–0.3 μm); *Q. pubescens*, F-H. F, equatorial view; G, polar view with three ectocolpi; H, ectocolpus and granulate-verrucate exine ornamentation without small granules; *Q. robur*, I-M. I, equatorial view; J, polar view with three, closed ectocolpi; K, four pollen in polar and equatorial view; L, ectocolpus and granulate-verrucate exine ornamentation; M, exine ornamentation details—see (Fig 1E).

doi:10.1371/journal.pone.0161762.g001

On average, the percentage share of deformed pollen grains in the samples (from 200 to 1000 grains per taxon) was similar and ranged from 15% in *Q. robur* and *Q. robur* × *Q. petraea* to 25% in *Q. petraea* × *Q. pubescens* (Fig 3). The highest frequency of deformed pollen was found in samples of *Q. petraea* and *Q. petraea* × *Q. pubescens* (30%) and the lowest in *Q. robur* (10%). In parental species, the lowest percentage of deformed pollen grains was observed in

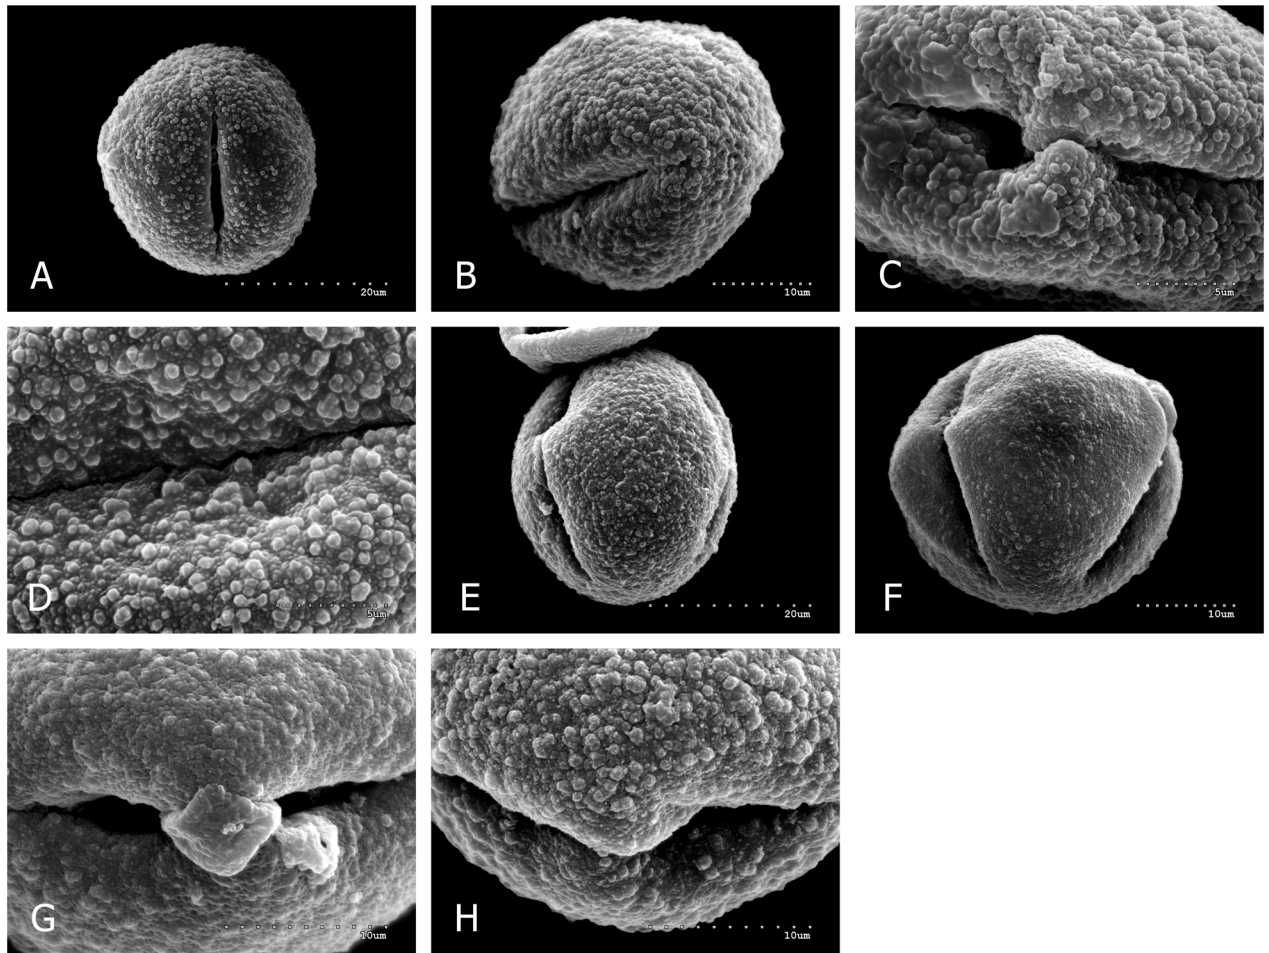

**Fig 2.** *Q. petraea* × *Q. pubescens*, A-D. A, equatorial view; B, polar view with one ectocolpus; C, ectocolpus and exine granulate-verrucate ornamentation; D, exine ornamentation details—see (Fig 1E); *Q. robur* × *Q. petraea*, E-H. E, equatorial view, F, polar view with two ectocolpi; G, ectocolpus and exine granulate-verrucate ornamentation; H, exine ornamentation details—see (Fig 1E).

doi:10.1371/journal.pone.0161762.g002

samples of *Q. robur* (10%); 20% in *Q. pubescens* and 30% in *Q. petraea*. On average, deformed pollen occurred at frequencies of 15, 20 and 22%, respectively, in the three species. In hybrids, the percentages of deformed pollen grains were: 15% in *Q. robur* × *Q. petraea* and 25% in *Q. petraea* × *Q. pubescens*. Many well-preserved pollen grains were found in the majority of the samples. The deformations consisted mainly in local ruptures of pollen grains, nearly always in

**Table 3.** The percentage participation of pollen grains in shape classes (P/E ratio) according to Erdtman’s (1952) classification.

| Taxon                                   | Pollen shape classes |                   |            |                    |            |         |
|-----------------------------------------|----------------------|-------------------|------------|--------------------|------------|---------|
|                                         | suboblate            | oblate-spheroidal | spheroidal | prolate-spheroidal | subprolate | prolate |
| <i>Q. petraea</i>                       | 1.2                  | 20.9              | 27.8       | 36.9               | 12.1       | 1.1     |
| <i>Q. pubescens</i>                     | 0.8                  | 16.4              | 29.0       | 42.1               | 10.5       | 1.3     |
| <i>Q. robur</i>                         | 1.2                  | 22.0              | 23.8       | 32.0               | 18.8       | 2.2     |
| <i>Q. petraea</i> × <i>Q. pubescens</i> | -                    | 24.44             | 38.89      | 25.56              | 10.00      | 1.11    |
| <i>Q. robur</i> × <i>Q. petraea</i>     | -                    | -                 | 13.33      | 46.67              | 40.00      | -       |

Suboblate (0.75–0.88); oblate-spheroidal (0.89–0.99); spheroidal (1.00); prolate-spheroidal (1.01–1.14); subprolate (1.15–1.33); prolate (1.34–2.00).

doi:10.1371/journal.pone.0161762.t003



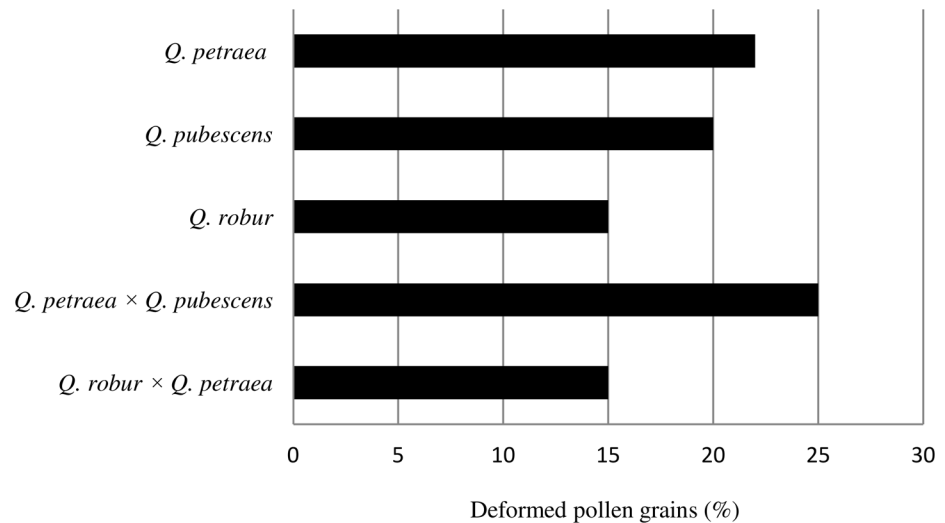

**Fig 3. Percentage of deformed pollen grains.**

doi:10.1371/journal.pone.0161762.g003

the aperture area, and their slight flattening due to reduced turgor. A small number of pollen grains were burst in the area of apertures and strongly deformed to the extent that they had unusual shapes and outlines caused by almost complete loss of turgor and strong flattening. Our observations in LM and SEM were made on acetolysed grains. The experience of the authors of the article allows for a statement that pollen prepared in such manner are subject to deformation in the process of acetolysis, under the influence of high temperature or impact of concentrated acids, as well as in the course of coating with gold target prior to observations in SEM, and in vacuum in SEM, when stream of electrons falls upon them. Due to such actions pollen burst and in consequence lose turgor.

### Interspecific variability of pollen grains

Results of the performed MANOVA indicate, that all taxa were significantly (Wilk's  $\lambda = 0.7984$ ;  $F_{36,7482} = 12.87$ ;  $P < 0.0001$ ) different for all nine traits. The analysis of variance for nine biometric traits [P ( $F_{4,2004} = 46.04$ ), E ( $F_{4,2004} = 27.94$ ), P/E ( $F_{4,2004} = 7.19$ ), Exp ( $F_{4,2004} = 19.59$ ), Exe ( $F_{4,2004} = 19.02$ ), Exp/P ( $F_{4,2004} = 24.89$ ), Exe/E ( $F_{4,2004} = 23.44$ ), Le ( $F_{4,2004} = 28.66$ ) and Le/P ( $F_{4,2004} = 8.89$ )] confirmed the variability of the tested taxa at the significance level  $\alpha = 0.001$  (Table 2). Mean values and coefficients of variations (CV) for the observed traits indicate high variability among the tested taxa for which significant differences were found in terms of all analysed morphological traits (Table 2, Fig 4).

The performed correlation analysis indicates statistically significant correlation coefficients of 29 out of 36 coefficients (Table 4). In the case of seven pairs of traits, no significant correlation was established of: Exp with P, Exp/P with P/E, Le with Exp, Le with Exe, Le/P with Exp, Le/P with Exe and Le/P with Exp/P. Seventeen out of 29 significantly correlated pairs of traits were characterised by positive correlation coefficients. This means that a value increase of one trait in a given pair leads to a value increase of the second trait.

The greatest differentiation of all the analysed phenotypic traits expressed jointly with the greatest Mahalanobis distance was recorded for the pollen grain of *Q. robur* × *Q. petraea* (Table 5). Pollen grains of *Q. robur* × *Q. petraea* differed significantly with respect to all the examined traits from the remaining taxa. In turn, the greatest phenotypic similarity was

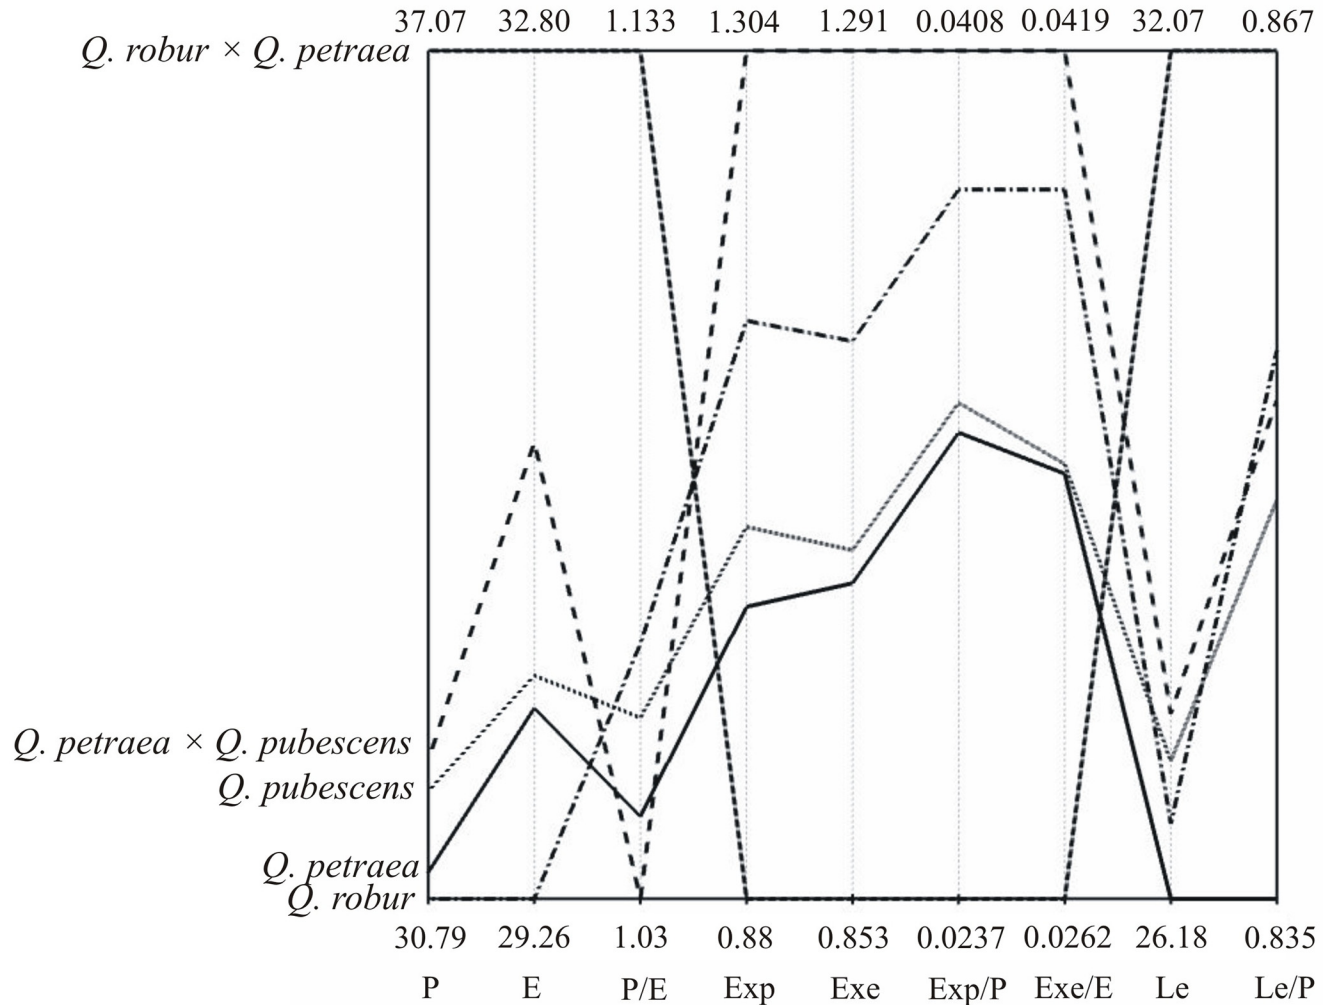

Fig 4. Parallel coordinate plots (PCPs) for five studied taxa and nine traits (P, E, P/E, Exp, Exp/P, Le, Le/P).

Table 4. The correlation matrix for the observed features.

| Feature | P         | E         | P/E      | Exp      | Exe      | Exp/P     | Exe/E     | Le       | Le/P |
|---------|-----------|-----------|----------|----------|----------|-----------|-----------|----------|------|
| P       | 1         |           |          |          |          |           |           |          |      |
| E       | 0.394***  | 1         |          |          |          |           |           |          |      |
| P/E     | 0.492***  | -0.598*** | 1        |          |          |           |           |          |      |
| Exp     | 0.006     | -0.111*** | 0.110*** | 1        |          |           |           |          |      |
| Exe     | -0.045*   | -0.099*** | 0.055*   | 0.851*** | 1        |           |           |          |      |
| Exp/P   | -0.216*** | -0.192*** | -0.007   | 0.971*** | 0.842*** | 1         |           |          |      |
| Exe/E   | -0.133*** | -0.331*** | 0.201*** | 0.828*** | 0.966*** | 0.843***  | 1         |          |      |
| Le      | 0.742***  | 0.349***  | 0.308*** | -0.010   | -0.038   | -0.178*** | -0.122*** | 1        |      |
| Le/P    | 0.045*    | 0.101***  | -0.060** | -0.026   | -0.014   | -0.041    | -0.045*   | 0.701*** | 1    |

See explanations to Table 2.

\* P<0.05;

\*\* P<0.01;

\*\*\*P<0.001.

doi:10.1371/journal.pone.0161762.t004

**Table 5. Phenotypic distance between the taxa calculated on the basis P, E, P/E, Exp, Exp/P, Le, Le/P by Mahalanobis distance.**

| Taxon                                   | <i>Q. petraea</i> | <i>Q. pubescens</i> | <i>Q. robur</i> | <i>Q. petraea</i> × <i>Q. pubescens</i> | <i>Q. robur</i> × <i>Q. petraea</i> |
|-----------------------------------------|-------------------|---------------------|-----------------|-----------------------------------------|-------------------------------------|
| <i>Q. petraea</i>                       | 0                 |                     |                 |                                         |                                     |
| <i>Q. pubescens</i>                     | 0.344             | 0                   |                 |                                         |                                     |
| <i>Q. robur</i>                         | 0.881             | 0.821               | 0               |                                         |                                     |
| <i>Q. petraea</i> × <i>Q. pubescens</i> | 0.619             | 0.599               | 0.915           | 0                                       |                                     |
| <i>Q. robur</i> × <i>Q. petraea</i>     | 2.931*            | 2.782*              | 3.089**         | 3.122**                                 | 0                                   |

\* P<0.05;

\*\* P<0.01.

doi:10.1371/journal.pone.0161762.t005

observed for *Q. robur* and *Q. petraea* × *Q. pubescens* (0.915), *Q. petraea* × *Q. pubescens* and *Q. petraea* (0.881) as well as for *Q. petraea* × *Q. pubescens* and *Q. pubescens* (0.821).

The first two canonical variables accounted for 84.38% of total multivariate variability between species and hybrids (Fig 5). This diagram of the first two canonical variables was used to divide the studied taxa into three groups. The first group comprised *Q. petraea*, *Q. pubescens* and *Q. petraea* × *Q. pubescens*, the second one included one taxon—*Q. robur* and the last

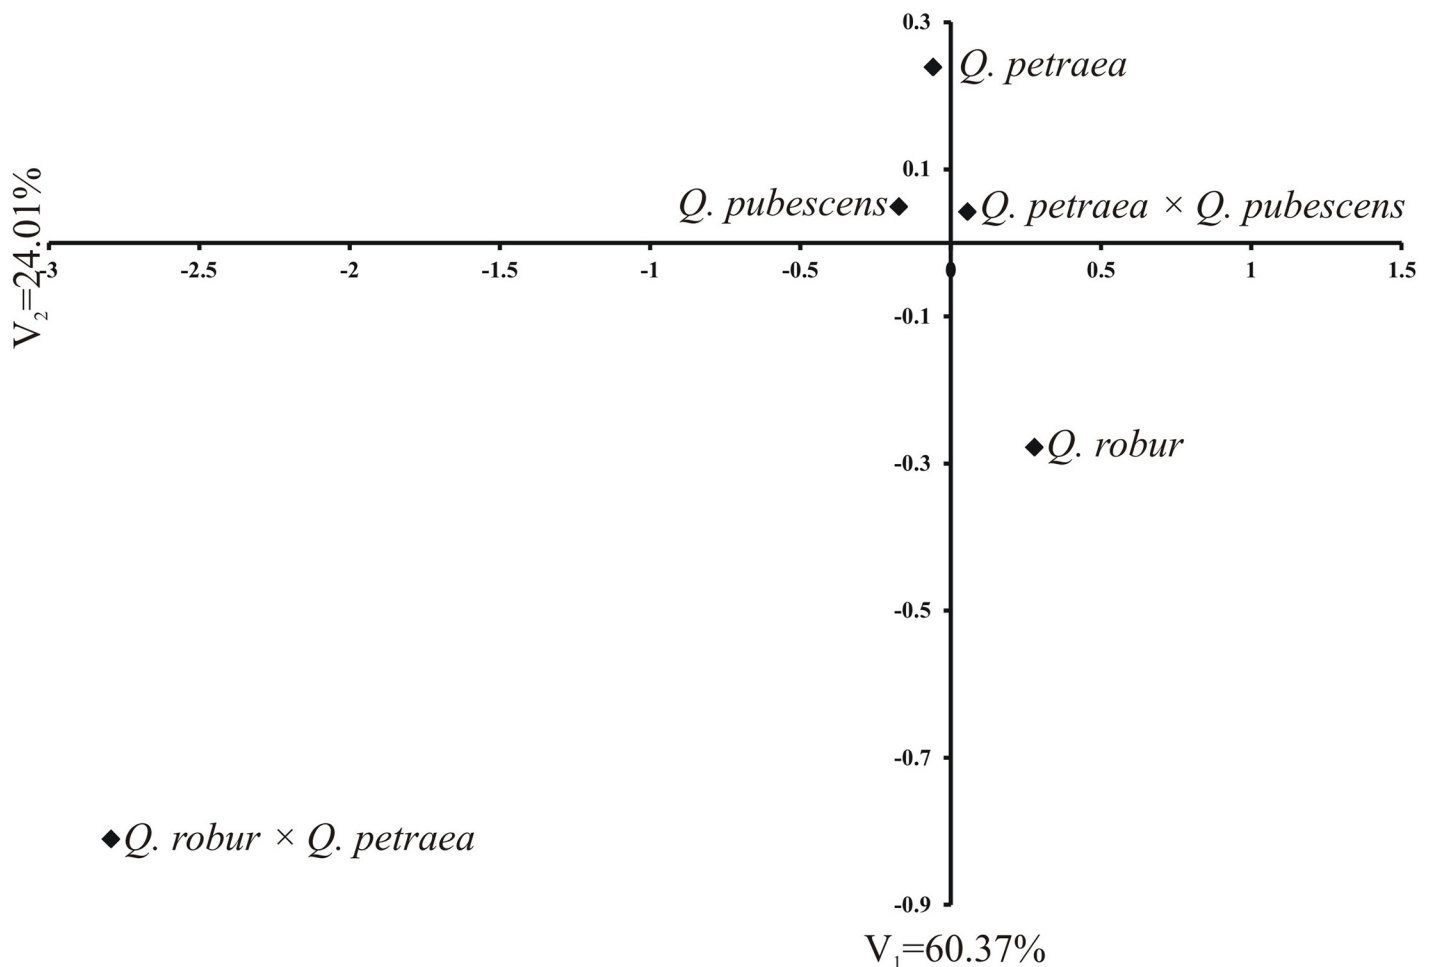

**Fig 5. Distribution of five *Quercus* taxa studied in the space of two first canonical variables.**

doi:10.1371/journal.pone.0161762.g005

**Table 6. Results of contrasts analysis between parental species and their hybrids.**

| Feature | Contrast                                                                    |                                                                                     |
|---------|-----------------------------------------------------------------------------|-------------------------------------------------------------------------------------|
|         | <i>Q. robur</i> , <i>Q. petraea</i> and <i>Q. robur</i> × <i>Q. petraea</i> | <i>Q. petraea</i> , <i>Q. pubescens</i> and <i>Q. petraea</i> × <i>Q. pubescens</i> |
| P       | -5.97 ***                                                                   | -0.61 *                                                                             |
| E       | -3.00 ***                                                                   | -1.38 ***                                                                           |
| P/E     | -0.082 ***                                                                  | 0.027 *                                                                             |
| Exp     | 0.217 **                                                                    | -0.187 ***                                                                          |
| Exe     | 0.225 **                                                                    | -0.204 ***                                                                          |
| Exp/P   | 0.0119 ***                                                                  | -0.0050 **                                                                          |
| Exe/E   | 0.0105 ***                                                                  | -0.0051 **                                                                          |
| Le      | -5.82 **                                                                    | -0.57                                                                               |
| Le/P    | -0.023                                                                      | -0.0016                                                                             |

See explanations to [Table 2](#).

\* P<0.05;

\*\* P<0.01;

\*\*\* P<0.001.

doi:10.1371/journal.pone.0161762.t006

group also embraced just one taxon *Q. ×rosacea*, which was very distant from the remaining groups ([Fig 5](#)).

Interesting results were obtained by the contrast analysis between parental species and their hybrids ([Table 6](#)). With respect to P, Le and E features, and to a lesser degree, also P/E, pollen grains of *Q. robur* × *Q. petraea* exhibited significantly and considerably higher means in comparison with the mean value of its parental forms (negative value of the contrast). In the case of Exp, Exe, Exp/P, Exp/E traits, mean values for *Q. robur* × *Q. petraea* were statistically significantly smaller, than the mean value of *Q. robur* and *Q. petraea*. Only for Le/P, there were no statistically significant differences between the mean values for hybrids and the parental forms ([Table 6](#)). The *Q. pubescens* × *Q. petraea* hybrid was characterised by statistically significantly higher mean values of P, E, Exp, Exe, Exp/E and Exe/E traits than its parental forms. Only for P/E, the *Q. petraea* × *Q. pubescens* hybrid outlined a lower mean from parental species (positive contrast value).

[Fig 6](#) shows the variability of pollen grain traits of 67 studied *Quercus* individuals in the configuration of the first two canonical variables. On the graph, the coordinates of the point for particular trees are values of the first and second canonical variables, respectively. The first two canonical variables accounted for 61.75% of the total multivariate variability between individual trees. The goal of the study was to establish whether pollen grains collected from various oak trees growing in different habitat conditions (soil, climate) would differ from one another. Six groups of trees were distinguished ([Fig 6](#)). The majority of the examined individuals was found in the first group (I). To the other five groups (II–VI) belongs a few trees (II—14, 22, 23, 36, 48 and 63, III—19–21, 24, 25, 30, 31, 49, 61, IV—44, 45, V—7, 46, 58, VI—64 ([Fig 6](#))). The analysis of the sites, from which flowers (pollen grains) from individual oak trees were collected, has shown, that in individual groups, both trees derived from the same sites [e.g. in group I, occur all analysed *Q. petraea* trees from Rokita (41–43) or nearly all *Q. pubescens* trees from Bielinek (51–57, 59–60)] as well as from places geographically distant from one another [e.g. from Austria—*Q. pubescens* (62) or from Poland—*Q. robur* from distant Białowieża and Bukowa Primeval Forest. A similar situation occurred also in smaller groups, for example, in group V—each of the three trees represents a different species derived from a different place



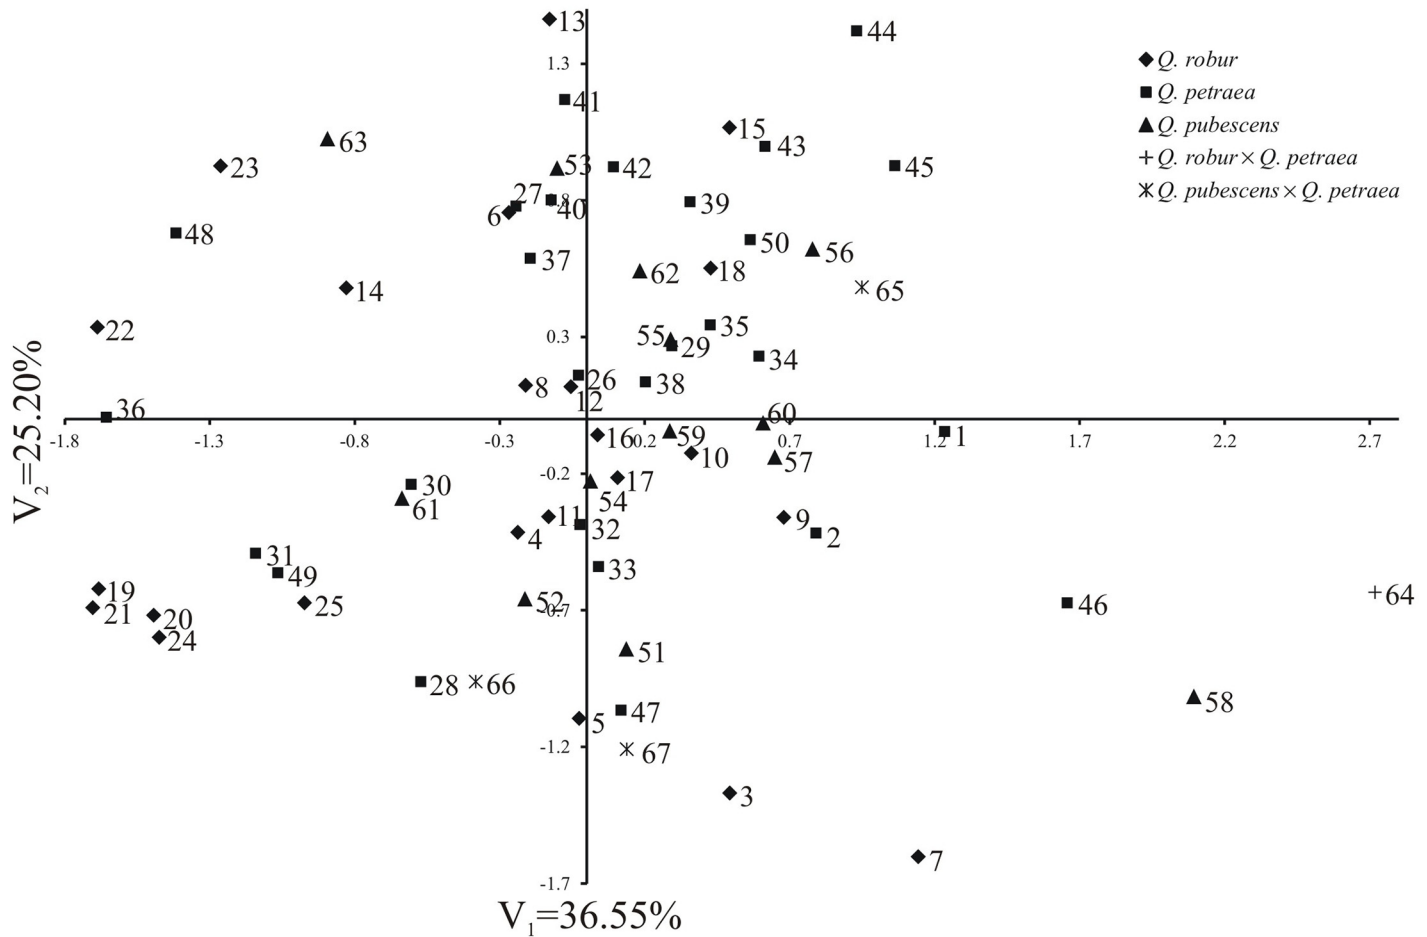

**Fig 6. Distribution of 67 *Quercus* trees studied in the space of two first canonical variables.**

doi:10.1371/journal.pone.0161762.g006

(*Q. robur* from Wielkopolski National Park—7, *Q. petraea* from Bukowa Primeval Forest—46, *Q. pubescens* from Bielinek—58). Only group IV is made up of two oaks derived from the same place—Bukowa Primeval Forest.

### Discussion

Palynological investigations on pollen grain features of parental species and their interspecific hybrids focus on comparing pollen size and much rarely involve proportions of deformed pollen grains in both these groups. According to some palynologists, hybrids have significantly larger pollen grains than those of their parents [58, 64, 81–83]. Also *Quercus* taxa investigated in the present study belong to this group because—as in the case of mean values of P and E features (pollen size), as well as for individual taxa—hybrids had greater pollen grains than parental species. Other researchers proved that hybrids can have pollen size similar or smaller than their parents [53, 55, 57, 60, 62, 66, 84, 85]. Last but not the least, there are also cases where some hybrids are characterised by pollen grains larger than parental species, while others—smaller [59, 61, 64].

Among the studied parental *Quercus* species, it was found that *Q. petraea* and *Q. pubescens* exhibited pollen grains most similar to each other. *Q. robur* differed from them on average, smaller pollen size and greater exine thickness (Table 2, Fig 5). In hybrids, the dissimilarity of

*Q. robur* × *Q. petraea* pollen grain features was more conspicuous than in all the remaining taxa. It is worth emphasising, that the oak from which the pollen grains derived, exhibited quite distinct hybrid morphological features. On the basis of contrast analysis, this taxon had the largest pollen grains of longest colpi, significantly bigger with respect to P, E, P/E and Le traits than the mean value of its parental forms. At the same time, it exhibited a fairly thin exine; therefore, mean values of traits associated with it (Exp, Exe, Exp/P, Exp/E) for *Q. robur* × *Q. petraea* were smaller in comparison with *Q. robur* and *Q. petraea*. Hybrid *Q. petraea* × *Q. pubescens*, even though, did not distinguish itself so clearly as *Q. robur* and *Q. petraea* (Fig 5). It was also characterised by larger mean values of nearly all analysed traits than in parental forms, including exine features (P, E, Exp, Exe, Exp/E and Exe/E) (Table 6). The hybrids derived from Bielinek on the Oder (NW Poland) to hybrids between *Q. petraea* and *Q. pubescens*. The phenomenon of crossing of *Q. pubescens* mainly with *Q. petraea* in a peculiar, strongly isolated as well as most distant population of this species from its dense range in Bielinek on the Oder was stressed by Staszkiwicz [86], Danielewicz et al. [87] as well as Krzakowa et al. [88]. However, in recent years, on the basis of genetic analyses employing 14 nuclear microsatellites as markers, it was found that degree of relationship between *Q. pubescens* individuals was considerable. It implies that crossing in the population occurs, to a large extent, between related individuals and, to a lesser degree, with other species [89]. This, by no means, indicates that interspecific hybrids do not occur there at all, but shows their smaller frequency.

Despite numerous palynological studies, descriptions of several important morphological features of *Quercus* pollen grains are not clear. This refers, in particular, to a very diverse, among representatives of this genus, exine ornamentation but also to endoaperture types. Also, data regarding perforation numbers are not accurate [38, 43, 62]. Palynologists give different types of exine ornamentation in SEM in different representatives of the *Quercus* genus. It can be either micro-rugulate, scabrate or scabrate-verrucate with verrucae beset with small, rounded processes [36], scabrate, microscabrate or microverrucate-scabrate [90], granulate, scabrate and microgranulate [62], granulate [72], verrucate or microverrucate [38], psilate-verrucate, verrucate, scabrate, scabrate-verrucate and psilate-scabrate [43] or microverrucate to verrucate, rarely regulate-granulate [90]. The three study species were either granulate or granulate-verrucate. This type of exine ornamentation has been selected because it is made primarily, of granules which are less than 1 μm (usually—0.5–1 μm), whereas verrucae exceed 1 μm [72].

In all studied taxa, with the exception of *Q. pubescens*, besides larger granules and verrucae also numerous smaller granules, commonly measuring 0.1–0.3 μm, occurred. Dissimilarity of *Q. pubescens* exine ornamentation compared to all studied *Quercus* taxa is also corroborated by Benthem et al. [36], Colombo et al. [17] and Smit [44]. The results of the present study agree with Benthem et al. [36] as well as Hesse et al. [72] that colpate or colpoidate pollen grains occurred in the investigated *Quercus* taxa. The latter ones were composed of a colp (ectoa-perture) with an indistinct endoaperture. Some researchers maintain, that both poroides as well as pori [43], or only pori [17, 44, 91–92] occur here, while others—in some part of the species (e.g. *Q. pubescens* Willd., *Q. aristata* Hook. & Arn., *Q. dumosa* Nutt., *Q. laurina* Bonpl.)—also find absence of the endoapertures [17, 47, 48].

The number of perforations differs, depending on authors; some report their total absence or only a few and others mention many with differing diameters and distributions on pollen grains [17, 36, 43, 47, 48, 91]. Results of this study corroborate the above observations; perforations were small, scarce or numerous, sometimes they could not be seen at all. They had different diameters and were usually distributed irregularly.

The results of statistical analyses are not unequivocal both with respect to the share of the 67 individuals (oak trees) in 6 groups to which they were assigned as well as to places of their collection. The majority of the investigated individuals belonged to the first, large group,

while the remaining ones occurred from single to several oak trees in the other five groups. In these groups, both individuals from different taxa (e.g. group 5 is made up of three individuals—*Q. petraea*, *Q. pubescens* and *Q. robur*) as well as trees representing the same taxa (e.g. group 4—*Q. petraea*) were found. Flowers from five *Q. pubescens* trees with traits typical for this species (51–55) were collected from the site in Bielinek Reserve (Poland) and, for comparison, from five other *Q. pubescens* trees (56–60) derived from Bielinek and growing in the Dendrological Garden of Poznań University of Life Sciences. Pollen grains of all these trees were similar to one another, because almost all of them were found in the same group—group 1 and only one tree (58) belonged to group 5. A similar situation was observed with geographical distribution. In the same group occurred both trees growing in the same site (e.g. in group 1—three *Q. petraea* trees from Rokita) as well as oaks derived from geographically distant sites (in group 2—*Q. robur* from Spain and from Dębno in Poland).

Not much information can be found in the literature on the subject concerning deformed pollen grains. Some palynologists maintain that the share of deformed pollen grains is greater in hybrids, than in parental species. Karlsdóttir et al. [60] reported that the in natural birch hybrids it was found two to three times more abnormal pollen than in parental species *Betula nana* and *B. pubescens*. However, in three parental *Crataegus* species and in their three natural hybrids, deformed pollen grains occurred with similar frequencies (20–40%) [64]. The results on *Quercus* pollen grains reported here are similar. The proportions of deformed pollen in parental *Quercus* species and hybrids were similar and, on average, represented by up to 15–25%.

Recapitulating, it was to be expected that not all of the closely related species of oaks can be safely distinguished using pollen morphology. In spite of such close relationships of the examined *Quercus* taxa, it was, nevertheless, possible to identify two (*Q. robur* × *Q. petraea* and *Q. pubescens*) from among five taxa on the basis of several analysed pollen features. Pollen size can be used as an auxiliary feature when diagnosing *Quercus* parental species and hybrids. Pollen shape is an interesting, hitherto omitted trait, which distinguishes both hybrids, especially *Q. robur* × *Q. petraea* characterised by the most elongated pollen grains. On the basis of exine ornamentation, it was possible to identify only *Q. pubescens*; the remaining species as well as hybrids did not differ significantly with regard to this feature. Only a greater number of such studies, based on large pollen samples, will show if there really is signal in pollen shape or exine ornamentation to tell species and hybrids apart. The determination of the diagnostic value of endoaperture features, i.e. their type (pori, poroides or both of these aperture types) as well as their presence or absence requires further comprehensive palynological investigations.

## Acknowledgments

The authors are grateful to the employees of Hajnówka, Dębno, Jarocin, Rokita, and Różańsko Forest Districts for support in the collection of plant materials. We would like to thank Professor Jean Bernard Diatta for linguistic support. We would like to thank the Reviewers for their detailed and valuable comments on the manuscript.

## Author Contributions

**Conceived and designed the experiments:** DWP WD.

**Performed the experiments:** DWP.

**Analyzed the data:** DWP JB.

**Contributed reagents/materials/analysis tools:** TM MJ.

**Wrote the paper:** DWP WD JB.

## References

1. Camus A. Les chênes: monographie du genre *Quercus*. Encyclopédie économique de silviculture, 6–8. Paris: Paul Lechevalier and Fils.; 1936–1954.
2. Elias TS. The genera of Fagaceae in the southeastern United States. *J Arnold Arbor*. 1971; 52: 159–195.
3. Lawrence GHM. *Taxonomy of Vascular Plants*. New York: The Macmillan Company; 1951.
4. Nixon CK, Jensen RJ, Manos P, Muller CH. *Quercus*. In: *Flora of North America, North of Mexico*. 3 Magnoliophyta: Magnoliidae and Hamamelidae. Oxford: University Press Nueva York; 1997. pp. 445–447.
5. Trelease W. The American oaks. *Mem Natl Acad Sci*. 1924; 20: 1–255.
6. Govaerts R, Frodin DG. *World Checklist and Bibliography of Fagales (Betulaceae, Corylaceae, Fagaceae and Ticodendraceae)*. Kew: Royal Botanical Gardens; 1998.
7. Manos PS, Doyle JJ, Nixon KC. Phylogeny, biogeography, and processes of molecular differentiation in *Quercus* subgenus *Quercus* (Fagaceae). *Mol Phylogenet Evol*. 1999; 12: 333–349. PMID: [10413627](https://pubmed.ncbi.nlm.nih.gov/10413627/)
8. Jones JH. Evolution of the Fagaceae: the implications of foliar features. *Ann Missouri Bot Gard*. 1986; 73: 228–275.
9. Soepadmo E. Fagaceae. *Flora Malenesia* 1972; 1(7): 265–403.
10. Axelrod DI. Biogeography of oaks in the Arcto-Tertiary province. *Ann Miss Bot Gard*. 1983; 70: 629–657.
11. Menitsky YL. *Oaks of Asia*. USA: Science Publishers, Enfield.; 2005.
12. Miller H, Lamb SH. *Oaks of North America*. USA: Naturegraph Publishers; 1985.
13. Nixon KC. Infrageneric classification of *Quercus* (Fagaceae) and typification of sectional names. *Ann For Sci*. 1993; 50: 25–34.
14. Valencia SA. Diversidad del genero *Quercus* (Fagaceae) en Mexico. *Bol Soc Bot Méx*. 2004; 75: 33–54.
15. Aas G. Taxonomical impact of morphological variation in *Quercus robur* and *Q. petraea*: a contribution to the hybrid controversy. *Ann For Sci*. 1993; 50(1): 107–113.
16. Burger WC. The species concept in *Quercus*. *Taxon*. 1975; 24(1): 45–50.
17. Colombo PM, Lorenzoni FC, Grigoletto F. Pollen grain morphology supports the taxonomical discrimination of Mediterranean oaks (*Quercus*, Fagaceae). *Plant Syst Evol*. 1983; 141: 273–284.
18. Palmer EJ. Hybrid oaks of North America. *J. Arnold Arbor*. 1948; 29: 1–48.
19. Petit R, Bodenes C, Ducouso A, Roussel G, Kremer A. Hybridization as a Mechanism of Invasion in Oaks. *New Phytol*. 2004; 161: 151–164.
20. Rushton BS. Natural hybridization within the genus *Quercus* L. *Ann For Sci*. 1993; 50(1): 73–90.
21. Tucker JM. Patterns of parallel evolution of leaf form in new world oaks. *Taxon* 1974; 23(1): 129–154.
22. De Candolle AP. *Prodromus Systematis Naturalis Regni Vegetabilis*. Part 16 (2). Paris: Sumptibus Victoris Masson et Filii; 1868.
23. Van Valen L. Ecological species, multispecies, and oaks. *Taxon* 1976; 2/3: : 233–239.
24. Schwarz O. *Monographie der Eichen Europas und des Mittelmeergebietes*. *Repertorium specierum novarum regni vegetabilis*. Berlin-Dahlem: Sonderbeihft D.; 1937.
25. Schwarz O. *Quercus* L. In: Tutin TG, Heywood VH, Burges NA, Valentine DH, Walters SM, Webb DA, editors. *Flora Europaea*. Cambridge: Cambridge University Press; 1964. pp. 61–64.
26. Denk T, Grimm GW. The oaks of western Eurasia: traditional classifications and evidence from two nuclear markers. *Taxon* 2010; 59: 351–366.
27. Muir G, Fleming CC, Schlitterer C. Taxonomy: Species status of hybridizing oaks. *Nature* 2000; 405: 1016. doi: [10.1038/35016640](https://doi.org/10.1038/35016640) PMID: [10890434](https://pubmed.ncbi.nlm.nih.gov/10890434/)
28. Rehder A. *Manual of cultivated trees and shrubs*. Second edition revised and enlarged. MacMillan Company, New York. 1940. pp 996.
29. Viscosi V, Lepais O, Gerber S, Fortini P. Leaf morphological analyses in four European oak species (*Quercus*) and their hybrids: A comparison of traditional and geometric morphometric methods. *Plants Biosystems* 2009; 143: 564–574.
30. Dering M, Lewandowski A. Unexpected disproportion observed in species composition between oak mixed stands and their progeny populations. *Ann For Sci*. 2007; 64: 413–418.



31. Dupouey JL, Badeau V. Morphological variability of oaks (*Quercus robur* L., *Q. petraea* (Matt) Liebl., *Q. pubescens* Willd.) in northeastern France. Preliminary results. *Ann Sci Forest*. 1993; 50(1): 35–40.
32. Kremer A, Dupouey JL, Deans JD, Cottrell J, Csaikl U, Finkeldey R, et al. Leaf morphological differentiation between *Quercus robur* and *Quercus petraea* is stable cross western European mixed oak stands. *Ann Sci Forest*. 2002; 59: 777–787.
33. Curtu AL, Gailing O, Finkeldey R. Evidence for hybridization and introgression within a species-rich oak (*Quercus* spp.) community. *BMC Evol Biol*. 2007; 7: 218. PMID: [17996115](https://pubmed.ncbi.nlm.nih.gov/17996115/)
34. Jedináková-Schmidtová J, Paule L, Magic D, Gömöry D. Morphological and genetic differentiation among the Central European white oaks. *Forest Genetics* 2004; 11(3–4): 263–271.
35. Gömöry D, Schmidtová J. Extent of nuclear genome sharing among white oak species (*Quercus* L. subgen. *Lepidobalanus* (Endl.) Oerst.) in Slovakia estimated by allozymes. *Plant Syst Evol*. 2007; 266: 253–264.
36. Benthem F, Clarke GCS, Punt W. The Northwest European pollen flora 33. Fagaceae. *Rev Palaeobot Palynol*. 1984; 42(1/4): 87–110.
37. Cao M, Zhou ZK. Pollen morphology and its systematic significance of the *Quercus* from China. *Guihaia* 2002; 22(1): 14–18.
38. Denk T, Grimm GW. Significance of pollen characteristics for infrageneric classification and phylogeny in *Quercus* (Fagaceae). *Intern J Plant Scie*. 2009; 170: 926–940.
39. Denk T, Tekleva MV. Pollen morphology and ultrastructure of *Quercus* with focus on Group Ilex (= *Quercus* subgenus *Heterobalanus* (Oerst.) Menitsky): implications for oak systematics and evolution. *Grana* 2014; 53(4): 255–282.
40. Makino M, Hayashi R, Takahara H. Pollen morphology of the genus *Quercus* by scanning electron microscope. *Sci Rep Kyoto Pref Univ*. 2009; 61: 53–81. [In Japanese]
41. Miyoshi N. Pollen morphology of Japanese *Quercus* (Fagaceae) by means of scanning electron microscope. *Jap J Palyn*. 1981; 27: 45–54.
42. Ostrolucka MG. Morphological characteristics of pollen grains of the species of genus *Quercus*. *Fol Dendro*. 1984; 11: 233–261.
43. Panahi PP, Pourmajidian MR, Fallah A, Pourhashemi M. Pollen morphology of *Quercus* (subgenus *Quercus*, section *Quercus*) in Iran and its systematic implication. *Acta Soc Bot Pol*. 2012; 81,1: 33–41.
44. Smit A. A scanning electron microscopical study of the pollen morphology in the genus *Quercus*. *Acta Bot Neerl*. 1973; 22(6): 655–665.
45. Solomon AM. Pollen morphology and plant taxonomy of white oaks in eastern North America. *Am J Bot*. 1983a; 70: 481–494.
46. Solomon AM. Pollen morphology and plant taxonomy of red oaks in eastern North America. *Am J Bot*. 1983b; 70: 495–607.
47. Medus J, Flores GG. Pollen morphology of some Mexican oaks. *Grana* 1984; 23(2): 77–84.
48. Diethart B. *Quercus robur*. In: PalDat—a palynological database. 2005; Available: [https://www.paldat.org/pub/Quercus\\_robur/108787](https://www.paldat.org/pub/Quercus_robur/108787).
49. Deng M, Song YG, Li QJ, Li QS. Pollen morphology of *Quercus* subg. *Cyclobalanopsis* (Fagaceae) and its systematic implication. *Guihaia* 2013; 33(3): 368–375 [in Chinese].
50. Dupont P, Dupont S. Etude de pollens de chênes (genre *Quercus* L.) en microscopie électronique à balayage. *Compt Rend Acad des Sciences*. 1972; 274(17): 2503–2506.
51. Olsson U. On the size and microstructure of pollen grains of *Quercus robur* and *Q. petraea* (Fagaceae). *Bot Notiser*. 1975; 128(2): 256–264.
52. Savitskii VD, Martinyuk OO, Shumik MI. Palynomorphological features of species of the genus *Quercus* L. in Ukraine. *Ukr Bot Zhurn*. 1999; 56(1): 33–36.
53. Chaturvedi M, Ram T, Pal M. Pollen morphology in *Chorisia* species and their hybrid. *Phytomorphology* 1993; 43(1/2): 25–28.
54. Datta K, Chaturvedi M., Ram T. Pollen exine ornamentation in the F2 generation of an interspecific hybrid of *Chorisia* (Bombacoideae, Malvaceae) in relation to inheritance pattern. *Grana* 2006; 45(2): 109–114.
55. Franssen AS, Skinner DZ, Al-Khatib K, Horak MJ. Pollen morphological differences in *Amaranthus* species and interspecific hybrids. *Weed Science* 2001; 49(6): 732–737.
56. Kumar CR, Nair PKK. Inheritance of exine ornamentation and pollen shape in the interspecific tetraploid hybrids of *Gloriosa*. *Can J Bot*. 2011; 64: 3134–3140.

57. Lu XM, Chen JY, Zhang LM, Zheng SQ, Yu D, Liao RY. Observation and comparison on pollen morphology of a new hybrid loquat variety 'Zaozhong 6' and its parentals. *Acta Hort Sin.* 2002; 29(3): 271–273.
58. Rhee HK, Cho HR, Kim KJ, Kim KS. Comparison of pollen morphology in interspecific hybrid lilies after in vitro chromosome doubling. *Acta Hort.* 2005; 673: 639–643.
59. Rushton BS. Pollen grain size in *Quercus robur* L. and *Quercus petraea* (Matt. Leibl.). *Watsonia* 1976; 11: 137–140.
60. Karlsdóttir L, Hallsdóttir M, Þórsson AT, Anamthawat-Jónsson K. Characteristics of pollen from natural triploid *Betula* hybrids. *Grana* 2008; 47(1): 52–59.
61. Lazarević M, Siljak-Yakovlev S, Lazarević P, Stevanović B, Stevanović V. Pollen and seed morphology of resurrection plants from the genus *Ramonda* (Gesneriaceae): relationship with ploidy level and relevance to their ecology and identification. *Turk J Bot.* 2013; 37: 872–885.
62. Scareli-Santos C, Herrera-Arroyo ML, Sánchez-Mondragón ML, González-Rodríguez A, Bacon J, Oyama K. Comparative analysis of micromorphological characters in two distantly related Mexican oaks, *Quercus conzattii* and *Q. eduardii* (Fagaceae), and their hybrids. *Brittonia* 2007; 59(1): 37–48.
63. Srivastava V, Pal M, Nair PKK. A study of the pollen grains of *Amaranthus spinosus* Linné and *A. dubius* Mart ex Thellung and their hybrids. *Rev Palaeobot Palynol.* 1977; 23(4): 287–291.
64. Wrońska-Pilarek D, Bocianowski J, Jagodziński AM. Comparison of pollen grain morphological features of selected species of the genus *Crataegus* L. (Rosaceae and their spontaneous, interspecific hybrids. *Bot J Linn Soc.* 2013; 172: 555–571.
65. Yang Qing Hua. Pollen morphology of *Osmanthus decorus* and *O. xburkwoodii*. *J Hubei Univ.* 2010; 28(3): 286–288. [in Chinese].
66. Ohashi H, Hoshi H., Iketani H. Taxonomy and pollen morphology of hybrids between *Sorbus* and *Micromeles* in the genus *Sorbus* (Rosaceae subfamily Maloideae). *J Jap Bot.* 1991; 66(2): 110–124.
67. Manos PS, Zhou Z, Cannon CH. Systematics of Fagaceae: phylogenetic tests of reproductive trait evolution. *Int J Plant Sci* 2001; 162:1361–1379.
68. Hubert F, Grimm GW, Jousselin E, Berry V, Franc A, Kremer A. Multiple nuclear genes stabilize the phylogenetic backbone of the genus *Quercus*. *Syst. biodivers.* 2014; 12: 405–423.
69. Wrońska-Pilarek D, Jagodziński AM, Bocianowski J, Janyszek M. The optimal sample size in pollen morphological studies using the example of *Rosa canina* L.—Rosaceae. *Palynology* 2015; 39(1): 56–75.
70. Erdtman G. The Acetolysis Method. A Revised Description. *Svensk Bot Tidskr.* 1960; 54: 561–564.
71. Punt W, Hoen PP, Blackmore S, Nilsson S, Le Thomas A. Glossary of pollen and spore terminology. *Rev Palaeobot Palynol.* 2007; 1431(2): 1–81.
72. Hesse M, Halbritter H, Zetter R, Weber M, Buchner R, Frosch-Radivo A, et al. *Pollen Terminology. An illustrated handbook.* Vienna: Springer; 2009.
73. Shapiro SS, Wilk MB. An analysis of variance test for normality (complete samples). *Biometrika* 1965; 52: 591–611.
74. Bocianowski J, Szulc P, Nowosad K. Parallel coordinate plots of maize traits under different magnesium applications. *J Integrat Agric.* 2015; 14(3): 593–597.
75. Kozak M. Use of parallel coordinate plots in multi-response selection of interesting genotypes. *Comm Bio Crop Science.* 2010; 5: 83–95.
76. Rencher AC. Interpretation of canonical discriminant functions, canonical variates, and principal components. *Am Stat.* 1992; 46: 217–225.
77. Seidler-Łożykowska K, Bocianowski J. Evaluation of variability of morphological traits of selected caraway (*Carum carvi* L.) genotypes. *Industrial Crops Prod.* 2012; 35: 140–145.
78. Mahalanobis PC. On the generalized distance in statistics. *Proc Natl Inst Sci India.* 1936; 12: 49–55.
79. Payne RW, Murray DA, Harding SA, Baird DB, Soutar DM. *Introduction to GenStat for Windows (15th Edition).* UK: VSN International; 2012.
80. Erdtman G. *Pollen morphology and plant taxonomy. Angiosperms. An introduction to palynology 1.* Stockholm: Almquist and Wiksell; 1952.
81. Rizaeva SM, Akhmedova MZ, Abdullaev AA. Pollen viability and pollen grain morphology in interspecific cotton hybrids differing in origin and ploidy. *Selsk Biol.* 1985; 9: 63–66 [in Russian].
82. Polevova SV, Kosenko YV, Leunova VM, Romanova ES, Severova EE, Tekleva MV. Pollen morphology of apple species and cultivars (*Malus*, Rosaceae). *Bot Zhurn.* 2014; 99(12): 1317–1335 [in Russian].

83. Van der Walt ID, Littlejohn GM. Pollen morphology, male hybrid fertility and pollen tube pathways in *Protea*. *S Afr J Bot*. 1996; 62: 236–246.
84. Delaporte K, Conran J, Sedgley M. Morphological analysis to identify the pollen parental of an ornamental interspecific hybrid *Eucalyptus*. *Hort Sci*. 2001; 89(1): 55–72.
85. Olsson U. A biometric study of the pollen morphology of *Linaria vulgaris* L. Miller and *L. repens* L. Miller (Scrophulariaceae) and their hybrid progeny in F<sub>1</sub> and F<sub>2</sub> generations. *Grana* 1974; 14(2–3): 92–99.
86. Staszkiwicz J. The systematical position of *Quercus pubescens* (pubescent oak) from the wood-land-steppe reserve in Bielinek on the Odra river basing it on the biometric analysis of the leaves. *Fragm. Flor. et Geobot*. 1977; 23(304): 259–273 [in Polish].
87. Danielewicz W, Bąkowska K, Krzak M. Variability of downy oak (*Quercus pubescens* Willd.) marginal population in Bielinek (north-western Poland) in marginal traits of leaves. *Rocz Dendr*. 2002; 50: 43–48.
88. Krzakowa M, Bąkowska K, Danielewicz W. Genetic variation in a marginal population of pubescent oak (*Quercus pubescens* Willd.) in Bielinek, on the Odra riverside. *Eco Quest*. 2004; 4: 77–82.
89. Chybicki IJ, Oleksa A, Kowalkowska K, Burczyk J. Genetic evidence of reproductive isolation in a remote enclave of *Quercus pubescens* in presence of cross-fertile species. *Plant Syst Evol*. 2012; 298: 1045–1056.
90. Nakagawa T, Yasuda Y, Tabata H. Pollen morphology of Himalayan *Pinus* and *Quercus* and its importance in palynological studies in Himalayan area. *Rev Palaeobot Palynol*. 1996; 91: 317–329.
91. Tekleva MV, Naryshkina NN, Evstigneeva TA. Fine structure of *Quercus* pollen from the Holocene sediments of the Sea of Japan. *Plant Syst Evol*. 2014; 300: 1877–1893.
92. Yamazaki T, Takeoka M. Electronmicroscope investigations on the surface structure of the pollen membrane, based on the replica method. V. Especially on the pollen of genus *Quercus*. *J Jap Forest Soc*. 1959; 41: 125–129.
